# Supplementary material for: Dietary pattern, inflammation and cognitive decline: The Whitehall II prospective cohort study
Source: PubMed Central journal article supplement (PMC5381339; doi:10.1016/j.clnu.2016.01.013), 2017-04
Supplement: mmc1.pdf [file mmc1.pdf]

Supplemental Table 1. Correlation coefficients between food groups and interleukin-6

| Food Group             | IL-6 (1991-1993)   | IL-6 (1997-1999)   |
|------------------------|--------------------|--------------------|
| Red meat               | 0.05               | 0.05 <sup>a</sup>  |
| Poultry                | 0.03               | 0.02               |
| Processed meats        | 0.03               | 0.05 <sup>a</sup>  |
| Organ meats            | 0.002              | 0.009              |
| Fish                   | 0.009              | -0.0003            |
| Refined grain          | 0.006              | 0.003              |
| Whole grain            | -0.04              | -0.08 <sup>a</sup> |
| Eggs                   | 0.04               | 0.04               |
| Butter                 | 0.02               | 0.04               |
| Margarine              | -0.01              | -0.01              |
| High-fat dairy         | 0.008              | 0.03               |
| Low-fat dairy          | 0.01               | 0.0005             |
| Soya products          | -0.002             | -0.007             |
| Liqueurs/spirits       | -0.01              | 0.03               |
| Wine                   | -0.01              | -0.03              |
| Beer                   | -0.02              | 0.02               |
| Hot drinks             | 0.03               | 0.01               |
| Fruits                 | 0.02               | 0.01               |
| Fruit juice            | -0.03              | -0.04              |
| Leafy vegetables       | 0.005              | 0.02               |
| Cruciferous vegetables | 0.02               | 0.01               |
| Other vegetables       | 0.020              | 0.007              |
| Tomatoes               | 0.03               | 0.006              |
| Peas and dried legumes | 0.02               | 0.05 <sup>a</sup>  |
| Soup                   | 0.02               | 0.03               |
| Nuts                   | -0.03              | -0.03              |
| Potatoes               | 0.02               | 0.0006             |
| Quiche/pie             | -0.02              | -0.02              |
| Pizza/lasagne          | -0.05 <sup>a</sup> | -0.07 <sup>a</sup> |
| Fried food             | 0.07 <sup>a</sup>  | 0.07 <sup>a</sup>  |
| Snacks                 | -0.002             | -0.04              |
| Desserts/biscuits      | -0.05              | -0.04              |
| Chocolate and sweets   | -0.01              | -0.02              |
| Sugar beverages        | 0.03               | 0.04               |
| Low-energy beverages   | .                  | .                  |
| Condiments             | 0.01               | -0.002             |
| Salad dressing         | -0.05 <sup>a</sup> | -0.07 <sup>a</sup> |

<sup>a</sup>p<0.001

Supplemental table 2. Association of inflammatory diet pattern score at baseline and cognitive decline over the subsequent 10 years stratified by median age(=56).

|                  | Cognitive change over 10 years, coefficient (95% CI) |                           |                           | p for interaction† | Cognitive change over 10 years, coefficient (95% CI) |                           |                          | p for interaction† |
|------------------|------------------------------------------------------|---------------------------|---------------------------|--------------------|------------------------------------------------------|---------------------------|--------------------------|--------------------|
|                  | Model 1                                              |                           |                           |                    | Model 2                                              |                           |                          |                    |
|                  | T1 (low)                                             | T2 (middle)               | T3 (high)                 |                    | T1 (low)                                             | T2 (middle)               | T3 (high)                |                    |
| <b>Age&lt;56</b> |                                                      |                           |                           |                    |                                                      |                           |                          |                    |
| Reasoning        | -0.28<br>(-0.33, -0.23)                              | -0.36<br>(-0.41, -0.30)** | -0.36<br>(-0.41, -0.30)** | 0.005              | -0.29<br>(-0.35, -0.23)                              | -0.37<br>(-0.43, -0.31)** | -0.35<br>(-0.41, -0.29)* | 0.009              |
| Memory           | -0.28<br>(-0.38, -0.18)                              | -0.35<br>(-0.45, -0.25)   | -0.33<br>(-0.43, -0.23)   | 0.33               | -0.26<br>(-0.37, -0.16)                              | -0.33<br>(-0.43, -0.22)   | -0.32<br>(-0.43, -0.22)  | 0.36               |
| Verbal fluency   | -0.38<br>(-0.45, -0.31)                              | -0.40<br>(-0.47, -0.33)   | -0.37<br>(-0.42, -0.31)   | 0.69               | -0.35<br>(-0.43, -0.27)                              | -0.39<br>(-0.47, -0.31)   | -0.35<br>(-0.43, -0.27)  | 0.54               |
| Global cognition | -0.31<br>(-0.35, -0.26)                              | -0.37<br>(-0.41, -0.32)** | -0.34<br>(-0.39, -0.29)   | 0.02               | -0.29<br>(-0.43, -0.27)                              | -0.39<br>(-0.47, -0.31)** | -0.35<br>(-0.43, -0.27)  | 0.01               |
| <b>Age≥56</b>    |                                                      |                           |                           |                    |                                                      |                           |                          |                    |
| Reasoning        | -0.31<br>(-0.38, -0.25)                              | -0.30<br>(-0.37, -0.24)   | -0.35<br>(-0.41, -0.29)   | 0.29               | -0.32<br>(-0.39, -0.25)                              | -0.31<br>(-0.38, -0.13)   | -0.35<br>(-0.42, -0.28)  | 0.52               |
| Memory           | -0.24<br>(-0.36, -0.13)                              | -0.26<br>(-0.37, -0.15)   | -0.27<br>(-0.39, -0.16)   | 0.85               | -0.26<br>(-0.39, -0.13)                              | -0.26<br>(-0.38, -0.14)   | -0.27<br>(-0.39, -0.15)  | 0.98               |
| Verbal fluency   | -0.35<br>(-0.43, -0.27)                              | -0.38<br>(-0.46, -0.30)   | -0.41<br>(-0.48, -0.33)   | 0.43               | -0.33<br>(-0.42, -0.25)                              | -0.37<br>(-0.45, -0.28)   | -0.40<br>(-0.49, -0.32)  | 0.31               |
| Global cognition | -0.32<br>(-0.38, -0.27)                              | -0.30<br>(-0.36, -0.25)   | -0.35<br>(-0.40, -0.29)   | 0.29               | -0.31<br>(-0.37, -0.24)                              | -0.31<br>(-0.37, -0.25)   | -0.34<br>(-0.40, -0.29)  | 0.39               |

Abbreviation: CI, confidence interval

NOTE: Estimates derived from linear mixed models using three assessments over 10 years.

Model 1 is adjusted for demographics include age, sex, ethnicity, occupational position, education, and total energy intake at baseline.

Model 2 is adjusted as in Model 1 + health related factors include body mass index, diabetes mellitus, hypertension, smoking history, and leisure time physical activity at baseline.

\*\*p<0.01, difference in mean cognitive decline compared with referent tertile 1.

\*p<0.05, difference in mean cognitive decline compared with referent tertile 1.

†The interaction term tested whether cognitive decline differed across the 3 tertiles of diet pattern score (i.e. low, middle, and high).

Supplemental Table 3. Association of inflammatory dietary pattern score at baseline and cognitive decline over the subsequent 10 years stratified by median body mass index.

|                  | Cognitive change over 10 years, coefficient (95% CI) |                          |                          | p for interaction† | Cognitive change over 10 years, coefficient (95% CI) |                           |                          | p for interaction† |
|------------------|------------------------------------------------------|--------------------------|--------------------------|--------------------|------------------------------------------------------|---------------------------|--------------------------|--------------------|
|                  | Model 1                                              |                          |                          |                    | Model 2                                              |                           |                          |                    |
|                  | Tertile 1 (low)                                      | Tertile 2 (middle)       | Tertile 3 (high)         |                    | Tertile 1 (low)                                      | Tertile 2 (middle)        | Tertile 3 (high)         |                    |
| <b>BMI&lt;26</b> |                                                      |                          |                          |                    |                                                      |                           |                          |                    |
| Reasoning        | -0.32<br>(-0.35, -0.28)                              | -0.34<br>(-0.38, -0.31)  | -0.37<br>(-0.41, -0.33)* | 0.11               | -0.30<br>(-0.35, -0.25)                              | -0.34<br>(-0.39, -0.28)   | -0.35<br>(-0.40, -0.29)  | 0.30               |
| Memory           | -0.24<br>(-0.30, -0.17)                              | -0.32<br>(-0.38, -0.25)  | -0.33<br>(-0.41, -0.26)  | 0.11               | -0.20<br>(-0.29, -0.10)                              | -0.28<br>(-0.38, -0.19)   | -0.30<br>(-0.40, -0.20)  | 0.14               |
| Verbal fluency   | -0.37<br>(-0.42, -0.33)                              | -0.42<br>(-0.47, -0.38)  | -0.38<br>(-0.44, -0.33)  | 0.29               | -0.36<br>(-0.43, -0.29)                              | -0.43<br>(-0.50, -0.36)   | -0.40<br>(-0.47, -0.33)  | 0.16               |
| Global cognition | -0.31<br>(-0.34, -0.28)                              | -0.36<br>(-0.39, -0.33)* | -0.36<br>(-0.39, -0.32)* | 0.03               | -0.28<br>(-0.33, -0.24)                              | -0.35<br>(-0.39, -0.30)** | -0.35<br>(-0.39, -0.30)* | 0.02               |
| <b>BMI&gt;26</b> |                                                      |                          |                          |                    |                                                      |                           |                          |                    |
| Reasoning        | -0.31<br>(-0.36, -0.26)                              | -0.37<br>(-0.42, -0.32)  | -0.38<br>(-0.42, -0.33)  | 0.13               | -0.31<br>(-0.37, -0.25)                              | -0.35<br>(-0.40, -0.29)   | -0.38<br>(-0.43, -0.32)* | 0.11               |
| Memory           | -0.27<br>(-0.36, -0.18)                              | -0.24<br>(-0.32, -0.16)  | -0.27<br>(-0.35, -0.19)  | 0.85               | -0.27<br>(-0.38, -0.17)                              | -0.24<br>(-0.33, -0.15)   | -0.26<br>(-0.36, -0.17)  | 0.86               |
| Verbal fluency   | -0.40<br>(-0.47, -0.33)                              | -0.37<br>(-0.43, -0.31)  | -0.41<br>(-0.47, -0.36)  | 0.56               | -0.39<br>(-0.46, -0.31)                              | -0.36<br>(-0.43, -0.29)   | -0.40<br>(-0.47, -0.33)  | 0.62               |
| Global cognition | -0.33<br>(-0.37, -0.28)                              | -0.33<br>(-0.37, -0.29)  | -0.35<br>(-0.47, -0.36)  | 0.65               | -0.32<br>(-0.37, -0.27)                              | -0.33<br>(-0.37, -0.28)   | -0.35<br>(-0.39, -0.30)  | 0.69               |

Abbreviation: CI, confidence interval

NOTE: Estimates derived from linear mixed models using three assessments over 10 years.

Model 1 is adjusted for demographics include age, sex, ethnicity, occupational position, education, and total energy intake at baseline.

Model 2 is adjusted as in Model 1 + health related factors include body mass index, diabetes mellitus, hypertension, smoking history, and leisure time physical activity at baseline.

\*\*p<0.01, difference in mean cognitive decline compared with referent tertile 1.

\*p<0.05, difference in mean cognitive decline compared with referent tertile 1.

†The interaction term tested whether cognitive decline differed across the 3 tertiles of diet pattern score (i.e. low, middle, and high).

Supplemental Table 4. Dietary characteristics of the study population by tertiles of inflammatory dietary pattern score

|                        | Diet pattern score              |                                      |                                |
|------------------------|---------------------------------|--------------------------------------|--------------------------------|
|                        | Tertile 1<br>(<-0.44)<br>n=1694 | Tertile 2<br>(-0.44, 0.41)<br>n=1695 | Tertile 3<br>(>0.41)<br>n=1694 |
| Red meat               | 35.1 (27.2)                     | 46.6 (30.1)                          | 60.4 (40.8)                    |
| Poultry                | 45.7 (31.7)                     | 53.4 (33.2)                          | 60.1 (47.4)                    |
| Processed meats        | 13.6 (10.6)                     | 17.2 (12.1)                          | 23.1 (16.5)                    |
| Organ meats            | 1.4 (2.4)                       | 1.5 (2.1)                            | 1.6 (2.6)                      |
| Fish                   | 30.9 (24.5)                     | 30.9 (25.1)                          | 29.6 (27.6)                    |
| Refined grain          | 88.3 (56.9)                     | 95.4 (58.3)                          | 111.2 (71.3)                   |
| Whole grain            | 181.6 (83.8)                    | 126.6 (66.1)                         | 79.0 (56.6)                    |
| Eggs                   | 12.2 (11.3)                     | 14.7 (12.6)                          | 18.9 (15.6)                    |
| Butter                 | 3.8 (6.5)                       | 5.4 (8.2)                            | 7.8 (11.2)                     |
| Margarine              | 13.3 (11.2)                     | 13.2 (10.9)                          | 13.1 (12.2)                    |
| High-fat dairy         | 66.9 (84.8)                     | 84.0 (106.6)                         | 95.6 (124.8)                   |
| Low-fat dairy          | 247.2 (151.9)                   | 264.8 (182.5)                        | 290.4 (226.1)                  |
| Soya products          | 5.7 (27.5)                      | 3.5 (21.4)                           | 2.2 (13.1)                     |
| Liqueurs/spirits       | 9.2 (13.4)                      | 10.5 (16.3)                          | 13.8 (25.0)                    |
| Wine                   | 120.5 (149.3)                   | 82.0 (104.1)                         | 56.6 (81.9)                    |
| Beer                   | 118.8 (211.2)                   | 138.0 (268.3)                        | 216.4 (414.5)                  |
| Hot drinks             | 545.1 (383.8)                   | 611.0 (393.3)                        | 719.9 (469.5)                  |
| Fruits                 | 299.2 (181.4)                   | 326.7 (223.2)                        | 341.9 (265.9)                  |
| Fruit juice            | 150.1 (138.9)                   | 123.1 (115.1)                        | 84.1 (92.2)                    |
| Leafy vegetables       | 17.3 (13.4)                     | 17.1 (14.9)                          | 18.6 (20.1)                    |
| Cruciferous vegetables | 56.0 (38.9)                     | 67.5 (45.1)                          | 78.4 (60.0)                    |
| Other vegetables       | 70.2 (44.3)                     | 75.5 (44.3)                          | 84.1 (92.2)                    |
| Tomatoes               | 43.9 (31.5)                     | 47.5 (34.2)                          | 53.1 (50.0)                    |
| Peas and dried legumes | 50.7 (30.3)                     | 61.1 (32.0)                          | 75.8 (48.9)                    |
| Soup                   | 35.5 (38.8)                     | 40.1 (42.2)                          | 46.7 (60.9)                    |
| Nuts                   | 6.6 (11.0)                      | 4.2 (6.2)                            | 3.1 (4.6)                      |
| Potatoes               | 87.1 (50.8)                     | 97.8 (58.3)                          | 102.1 (62.3)                   |
| Quiche/pie             | 11.5 (11.2)                     | 12.2 (11.6)                          | 12.4 (13.1)                    |
| Pizza/lasagne          | 25.5 (21.0)                     | 20.6 (17.7)                          | 15.1 (16.1)                    |
| Fried food             | 42.7 (31.2)                     | 54.5 (35.4)                          | 70.1 (46.2)                    |
| Snacks                 | 8.1 (11.1)                      | 6.6 (8.7)                            | 5.8 (8.1)                      |
| Desserts/biscuits      | 65.2 (47.4)                     | 59.6 (40.6)                          | 46.4 (34.3)                    |
| Chocolate and sweets   | 32.0 (22.4)                     | 34.1 (24.4)                          | 32.0 (24.2)                    |
| Sugar beverages        | 50.6 (84.3)                     | 67.7 (101.3)                         | 82.1 (123.7)                   |
| Low-energy beverages   | 0                               | 0                                    | 0                              |
| Condiments             | 20.8 (17.8)                     | 23.4 (20.7)                          | 24.5 (23.2)                    |
| Salad dressing         | 7.7 (7.7)                       | 5.6 (5.9)                            | 3.7 (4.8)                      |
